# Supplementary material
Source: PubMed Central journal article supplement (PMC187898)

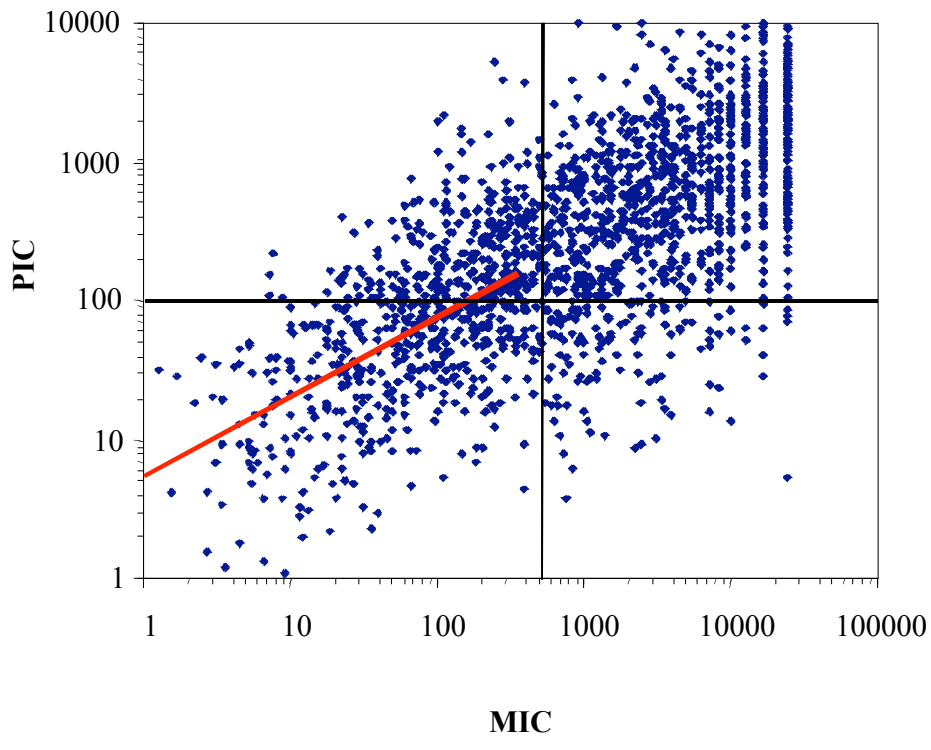

Supplement: pnas_100_17_9952__10.pdf [file pnas_100_17_9952__10.pdf]
